# Supplementary material
Source: MDPI journal article supplement (https://www.mdpi.com/2073-4344/13/2/399)
Supplement: s1 [file s1]

# Synthesis and Characterization of Fe doped Aurivillius-phase $\text{PbBi}_2\text{Nb}_2\text{O}_9$ perovskite and their photocatalytic activity on the degradation of methylene blue

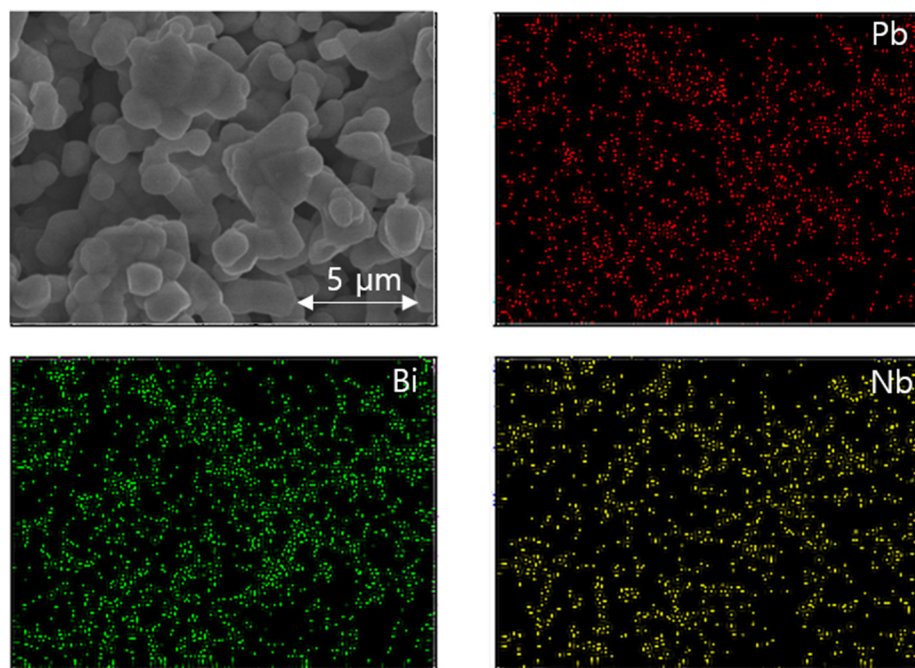

**Figure S1.** SEM-EDX images of as-synthesized non-doped PBNO.

**Table S1.** SEM-EDX atomic percent results of as-synthesized PBNO and PBNO-0.2F.

| <b>PBNO<br/>Element</b> | <b>Weight (%)</b> | <b>Atomic (%)</b> |
|-------------------------|-------------------|-------------------|
| <b>O</b>                | <b>15.07</b>      | <b>63.71</b>      |
| <b>Nb</b>               | <b>19.66</b>      | <b>14.75</b>      |
| <b>Pb</b>               | <b>21.45</b>      | <b>7.12</b>       |
| <b>Bi</b>               | <b>43.82</b>      | <b>14.42</b>      |
| <b>Total</b>            | <b>100</b>        | <b>100</b>        |

| <b>PBNO-0.2F<br/>Element</b> | <b>Weight (%)</b> | <b>Atomic (%)</b> |
|------------------------------|-------------------|-------------------|
| <b>O</b>                     | <b>15.17</b>      | <b>61.95</b>      |
| <b>Nb</b>                    | <b>19.58</b>      | <b>13.77</b>      |
| <b>Pb</b>                    | <b>21.63</b>      | <b>6.82</b>       |
| <b>Bi</b>                    | <b>39.17</b>      | <b>12.25</b>      |
| <b>F</b>                     | <b>4.45</b>       | <b>5.21</b>       |
| <b>Total</b>                 | <b>100</b>        | <b>100</b>        |
